# Supplementary material for: Controlled growth of a porous hydroxyapatite nanoparticle coating on a titanium fiber for rapid and efficient solid-phase microextraction of polar chlorophenols, triclosan and bisphenol A from environmental water
Source: Royal Society of Chemistry journal article supplement (doi:10.1039/c8ay00570b), 2018-01-01
Supplement: c8ay00570b1.pdf [file c8ay00570b1.pdf]

### Electronic Supplementary Information

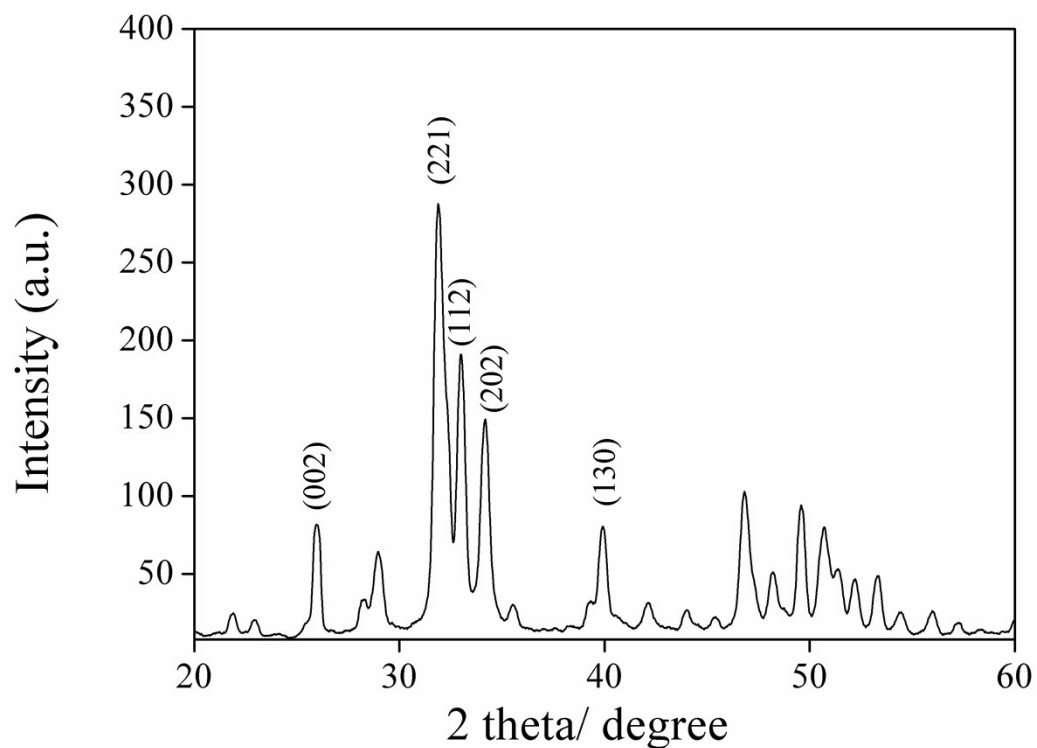

Fig. S1 XRD pattern of HANPs.

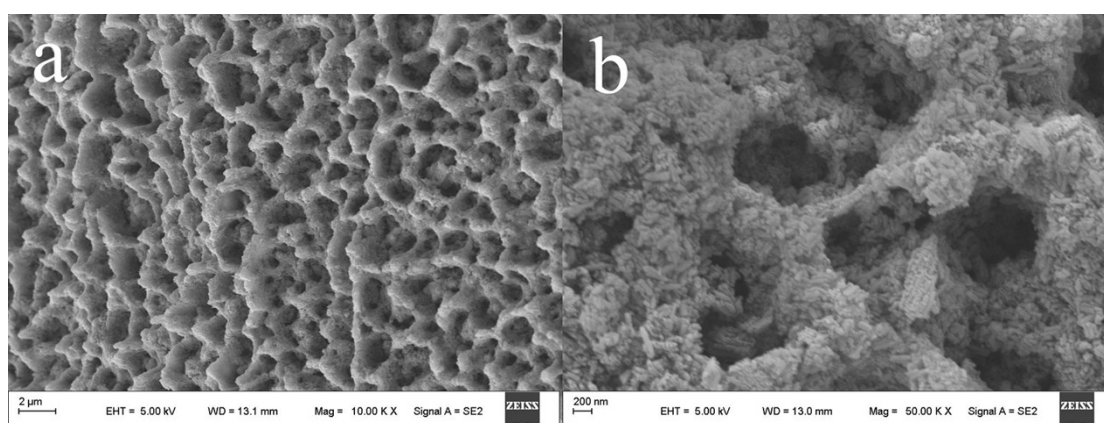

Fig. S2 SEM micrographs (a $\times$ 10000 and b $\times$ 50000) of the Ti-TiO<sub>2</sub>MPs@HANPs fiber after soaking in organic solvents for 24 h.
